# Supplementary material for: Investigation of the network of preferred interactions in an artificial coiled-coil association using the peptide array technique
Source: publisher site journal article supplement (doi:10.3762/bjoc.8.71), 2012-04-25
Supplement: Additional file 1 [file 1860-5397-8-71-S1.pdf]

# **Supporting Information**

**for**

## **Investigation of the network of preferred interactions in an artificial coiled-coil association using the peptide array technique**

Raheleh Rezaei Araghi<sup>†1</sup>, Carsten C. Mahrenholz<sup>†2</sup>, Rudolf Volkmer<sup>2</sup>, Beate Kokscho<sup>\*1</sup>

Address: <sup>1</sup>Institute of Chemistry and Biochemistry, Freie Universität Berlin, Berlin, Germany and <sup>2</sup>Institut für Medizinische Immunologie, Charité-Universitätsmedizin Berlin, Augustenburger Platz 1, 13353, Berlin, Germany.

Email: Beate Kokscho\* - kokscho@chemie.fu-berlin.de

\* Corresponding author

<sup>†</sup> These authors contributed equally to this work.

Complete set of SPOT intensities.

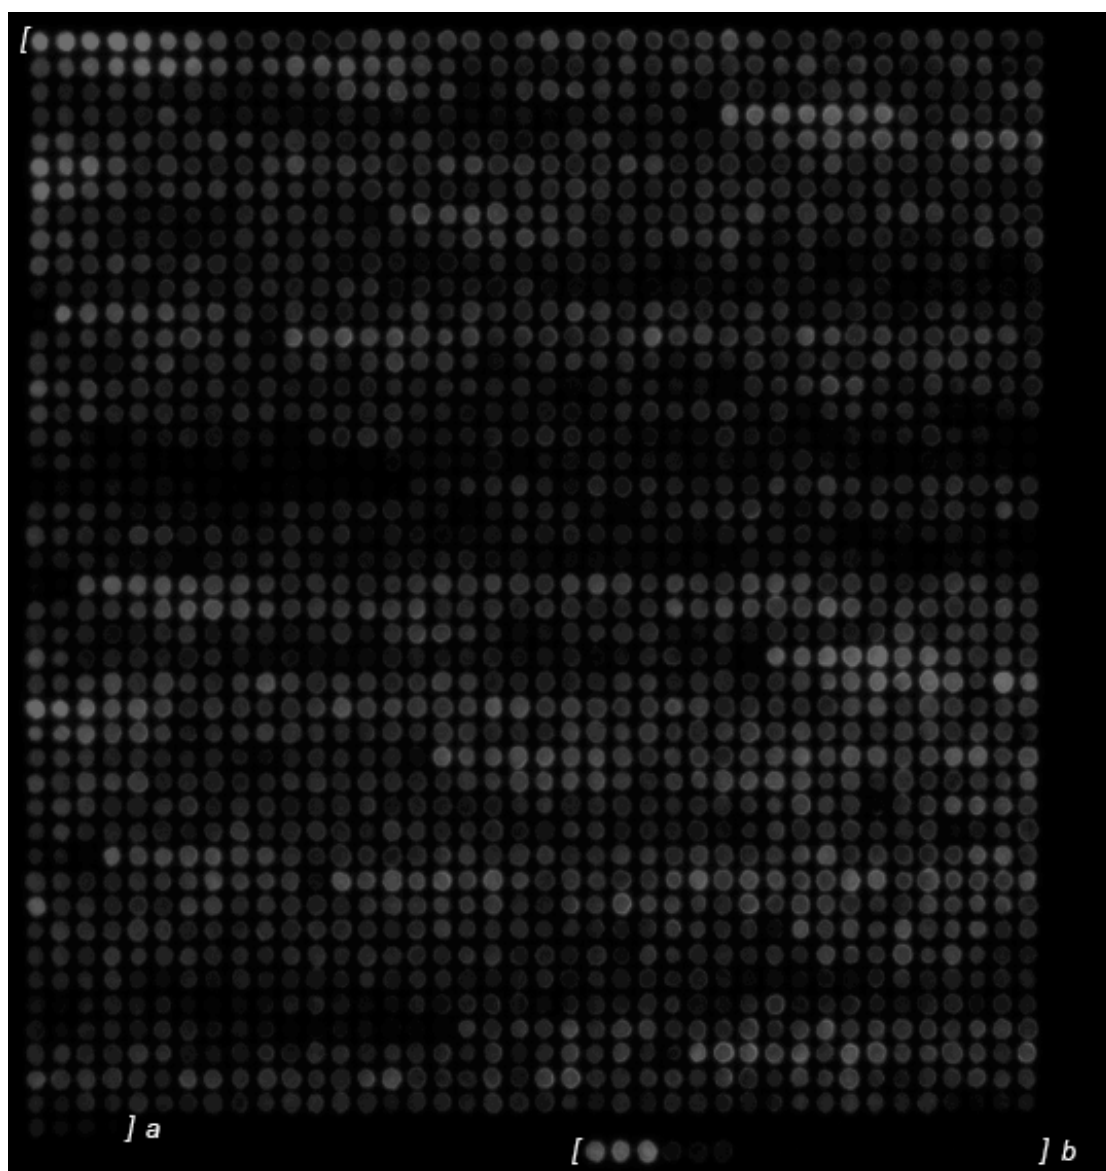

Figure S1. Full set of spot intensities from the membrane probing. a) The random mutation resulting in 1764 spots and (b) the Gly scanning of Acid-pp sequences as described in the main text.

Table S1. The complete set of SPOT intensities detected from 1764 mutants on the cellulose membrane.\*

\*The values are in Boehringer Light Units (BLUs) and resulted from  $(I^{B\beta 2\gamma} - I^{R\beta 2\gamma})$ .  $I^{B\beta 2\gamma}$  and  $I^{R\beta 2\gamma}$  are the intensity of each spot when the membrane is screened against B $\beta$ 2 $\gamma$  and R $\beta$ 2 $\gamma$ , respectively.

|          |           |          |           |          |           |          |           |          |           |          |           |          |           |
|----------|-----------|----------|-----------|----------|-----------|----------|-----------|----------|-----------|----------|-----------|----------|-----------|
| LsaLEKE  | 20424,984 | VsaLEKE  | 7793,704  | AsaLEKE  | 4069,144  | IslaLEKE | 10941,831 | FsaLEKE  | 13737,3   | YsaLEKE  | 11723,013 | LsaVEKE  | 9201,354  |
| LsaLEKV  | 20796,744 | VsaLEKV  | 11014,524 | AsaLEKV  | 4745,624  | IslaLEKV | 14804,18  | FsaLEKV  | 10274,126 | YsaLEKV  | 7088,457  | LsaVEKV  | 13503,972 |
| LsaLEKL  | 20395,664 | VsaLEKL  | 10705,409 | AsaLEKL  | 6585,222  | IslaLEKL | 13248,799 | FsaLEKL  | 10674,98  | YsaLEKL  | 9422,829  | LsaVEKL  | 13335,884 |
| LsaLEKI  | 21117,853 | VsaLEKI  | 12853,853 | AsaLEKI  | 9771,788  | IslaLEKI | 13468,944 | FsaLEKI  | 12110,682 | YsaLEKI  | 6651,75   | LsaVEKI  | 14525,805 |
| LsaLEKA  | 20557,504 | VsaLEKA  | 10536,255 | AsaLEKA  | 9177,914  | IslaLEKA | 12695,617 | FsaLEKA  | 13086,692 | YsaLEKA  | 12540,664 | LsaVEKA  | 11807,015 |
| LsaLEKY  | 16438,266 | VsaLEKY  | 7182,462  | AsaLEKY  | 4148,947  | IslaLEKY | 9434,281  | FsaLEKY  | 10553,386 | YsaLEKY  | 6191,737  | LsaVEKY  | 11818,084 |
| LsaLEKD  | 15830,153 | VsaLEKD  | 8205,8574 | AsaLEKD  | 2924,174  | IslaLEKD | 10051,976 | FsaLEKD  | 12454,004 | YsaLEKD  | 8120,71   | LsaVEKD  | 8407,1209 |
| LsaLVKE  | 10162,404 | VsaLVKE  | 6282,954  | AsaLVKE  | 4812,008  | IslaLVKE | 7161,744  | FsaLVKE  | 8407,354  | YsaLVKE  | 10166,829 | LsaVVEKE | 6177,856  |
| LsaLVKV  | 4843,249  | VsaLVKV  | 2715,986  | AsaLVKV  | 3196,227  | IslaLVKV | 3433,79   | FsaLVKV  | 4843,597  | YsaLVKV  | 3829,229  | LsaVVKV  | 2145,268  |
| LsaLVKL  | 6518,869  | VsaLVKL  | 4811,444  | AsaLVKL  | 5760,094  | IslaLVKL | 4926,65   | FsaLVKL  | 5825,57   | YsaLVKL  | 4506,95   | LsaVVKL  | 4468,524  |
| LsaLVKI  | 3742,82   | VsaLVKI  | 4209,116  | AsaLVKI  | 3467,274  | IslaLVKI | 4857,994  | FsaLVKI  | 6131,42   | YsaLVKI  | 3964,816  | LsaVVKI  | 3464,219  |
| LsaLVKA  | 2932,792  | VsaLVKA  | 3961,864  | AsaLVKA  | 2984,997  | IslaLVKA | 3612,185  | FsaLVKA  | 4179,447  | YsaLVKA  | 5425,003  | LsaVVKA  | 1616,364  |
| LsaLVKY  | 5319,932  | VsaLVKY  | 5366,794  | AsaLVKY  | 8224,734  | IslaLVKY | 7985,927  | FsaLVKY  | 7985,927  | YsaLVKY  | 3113,984  | LsaVVKY  | 3020,757  |
| LsaLVKD  | 9306,264  | VsaLVKD  | 6042,734  | AsaLVKD  | 4394,3906 | IslaLVKD | 7099,193  | FsaLVKD  | 10704,324 | YsaLVKD  | 7296,222  | LsaVVKD  | 5507,277  |
| LsaLLKE  | 10129,524 | VsaLLKE  | 10127,363 | AsaLLKE  | 7406,012  | IslaLLKE | 9225,439  | FsaLLKE  | 14055,64  | YsaLLKE  | 5519,539  | LsaVLKE  | 7968,412  |
| LsaLLKV  | 6318,974  | VsaLLKV  | 4945,477  | AsaLLKV  | 4211,594  | IslaLLKV | 5709,74   | FsaLLKV  | 8936,78   | YsaLLKV  | 4462,944  | LsaVLKV  | 4979,894  |
| LsaLLKL  | 7851,372  | VsaLLKL  | 6867,994  | AsaLLKL  | 4896,454  | IslaLLKL | 7983,39   | FsaLLKL  | 11792,27  | YsaLLKL  | 5605,612  | LsaVLKL  | 7443,399  |
| LsaLLKI  | 7323,554  | VsaLLKI  | 5478,528  | AsaLLKI  | 4086,334  | IslaLLKI | 5980,59   | FsaLLKI  | 10848,75  | YsaLLKI  | 2904,76   | LsaVLKI  | 6393,138  |
| LsaLLKA  | 4552,25   | VsaLLKA  | 4565,734  | AsaLLKA  | 3616,614  | IslaLLKA | 4677,82   | FsaLLKA  | 6515,61   | YsaLLKA  | 3391,832  | LsaVLKA  | 4671,014  |
| LsaLLKY  | 7697,191  | VsaLLKY  | 6777,474  | AsaLLKY  | 2840,034  | IslaLLKY | 8627,443  | FsaLLKY  | 8785,554  | YsaLLKY  | 3113,984  | LsaVLKY  | 5847,168  |
| LsaLLKD  | 11299,119 | VsaLLKD  | 8107,807  | AsaLLKD  | 5273,742  | IslaLLKD | 10903,924 | FsaLLKD  | 15064,464 | YsaLLKD  | 5232,893  | LsaVLKD  | 6940,443  |
| LsaLIKE  | 10774,035 | VsaLIKE  | 7100,329  | AsaLIKE  | 4602,996  | IslaLIKE | 7998,084  | FsaLIKE  | 15128,144 | YsaLIKE  | 5318,624  | LsaVIKE  | 9780,359  |
| LsaLIVK  | 5886,171  | VsaLIVK  | 3303,976  | AsaLIVK  | 3147,376  | IslaLIVK | 4304,18   | FsaLIVK  | 7224,386  | YsaLIVK  | 3583,021  | LsaLIVK  | 4245,839  |
| LsaLIKL  | 8638,414  | VsaLIKL  | 5964,631  | AsaLIKL  | 4345,673  | IslaLIKL | 8213,64   | FsaLIKL  | 10971,86  | YsaLIKL  | 4907,914  | LsaLIVL  | 7194,074  |
| LsaLIKI  | 6498,388  | VsaLIKI  | 3391,41   | AsaLIKI  | 3732,266  | IslaLIKI | 5989,83   | FsaLIKI  | 7832,3    | YsaLIKI  | 4165,34   | LsaVIKI  | 4805,27   |
| LsaLIKA  | 5138,294  | VsaLIKA  | 2568,863  | AsaLIKA  | 3211,634  | IslaLIKA | 4581,554  | FsaLIKA  | 5655,511  | YsaLIKA  | 4008,206  | LsaVIKA  | 2434,044  |
| LsaLIKY  | 8183,929  | VsaLIKY  | 10929,711 | AsaLIKY  | 4911,244  | IslaLIKY | 9468,54   | FsaLIKY  | 8551,543  | YsaLIKY  | 3124,014  | LsaVIKY  | 3968,289  |
| LsaLIKD  | 12451,307 | VsaLIKD  | 9296,917  | AsaLIKD  | 3355,768  | IslaLIKD | 11030,441 | FsaLIKD  | 8909,177  | YsaLIKD  | 5540,051  | LsaVIKD  | 7215,675  |
| LsaLaKE  | 9553,3516 | VsaLaKE  | 7052,3648 | AsaLaKE  | 3304,1789 | IslaLaKE | 9722,413  | FsaLaKE  | 8560,203  | YsaLaKE  | 5895,684  | LsaVaKE  | 6779,934  |
| LsaLaKV  | 4229,794  | VsaLaKV  | 2549,774  | AsaLaKV  | 1881,446  | IslaLaKV | 4232,615  | FsaLaKV  | 3429,052  | YsaLaKV  | 2383,648  | LsaVaKV  | 2191,854  |
| LsaLaKL  | 4902,384  | VsaLaKL  | 3269,8678 | AsaLaKL  | 2370,154  | IslaLaKL | 6134,668  | FsaLaKL  | 4045,489  | YsaLaKL  | 3181,834  | LsaVaKL  | 3250,364  |
| LsaLaKI  | 5317,494  | VsaLaKI  | 2887,932  | AsaLaKI  | 2442,259  | IslaLaKI | 5102,63   | FsaLaKI  | 2997,93   | YsaLaKI  | 1994,304  | LsaVaKI  | 6085,374  |
| LsaLaKA  | 2644,5285 | VsaLaKA  | 984,955   | AsaLaKA  | 2104,9944 | IslaLaKA | 3298,884  | FsaLaKA  | 2900,564  | YsaLaKA  | 4325,189  | LsaVaKA  | 2978,374  |
| LsaLaKY  | 3842,829  | VsaLaKY  | 2997,437  | AsaLaKY  | 1901,371  | IslaLaKY | 4394,971  | FsaLaKY  | 3674,971  | YsaLaKY  | 1389,455  | LsaVaKY  | 3863,655  |
| LsaLaKD  | 5891,7987 | VsaLaKD  | 4835,067  | AsaLaKD  | 2615,1658 | IslaLaKD | 7918,454  | FsaLaKD  | 5814,01   | YsaLaKD  | 6659,961  | LsaVaKD  | 6073,364  |
| LsaLYKE  | 6647,009  | VsaLYKE  | 5431,053  | AsaLYKE  | 4857,384  | IslaLYKE | 7789,262  | FsaLYKE  | 6334,47   | YsaLYKE  | 4374,409  | LsaVYKE  | 6093,696  |
| LsaLYKV  | 4220,864  | VsaLYKV  | 3535,707  | AsaLYKV  | 3849,764  | IslaLYKV | 3822,294  | FsaLYKV  | 3454,624  | YsaLYKV  | 2583,11   | LsaVYKV  | 2299,362  |
| LsaLYKL  | 5388,24   | VsaLYKL  | 4653,056  | AsaLYKL  | 3794,654  | IslaLYKL | 4848,941  | FsaLYKL  | 5006,024  | YsaLYKL  | 3826,586  | LsaVYKL  | 4369,769  |
| LsaLYKI  | 3575,479  | VsaLYKI  | 4053,422  | AsaLYKI  | 4187,036  | IslaLYKI | 5520,835  | FsaLYKI  | 4544,495  | YsaLYKI  | 2917,084  | LsaVYKI  | 3228,488  |
| LsaLYKA  | 2567,102  | VsaLYKA  | 3335,687  | AsaLYKA  | 5038,552  | IslaLYKA | 3399,536  | FsaLYKA  | 3613,901  | YsaLYKA  | 4829,305  | LsaVYKA  | 2131,099  |
| LsaLYKY  | 8779,764  | VsaLYKY  | 3003,564  | AsaLYKY  | 2318,624  | IslaLYKY | 4689,41   | FsaLYKY  | 3919,934  | YsaLYKY  | 3109,945  | LsaVYKY  | 2906,013  |
| LsaLYKD  | 10396,715 | VsaLYKD  | 4836,893  | AsaLYKD  | 3574,189  | IslaLYKD | 6324,617  | FsaLYKD  | 6823,248  | YsaLYKD  | 9412,226  | LsaVYKD  | 4394,996  |
| LsaLDKE  | 14325,184 | VsaLDKE  | 4954,1107 | AsaLDKE  | 984,0225  | IslaLDKE | 8630,939  | FsaLDKE  | 6755,755  | YsaLDKE  | 6654,514  | LsaVDKE  | 3935,014  |
| LsaLDKV  | 17048,023 | VsaLDKV  | 8494,002  | AsaLDKV  | 4220,569  | IslaLDKV | 11575,564 | FsaLDKV  | 9186,417  | YsaLDKV  | 5515,368  | LsaVDKV  | 9167,295  |
| LsaLDKL  | 19113,994 | VsaLDKL  | 8793,145  | AsaLDKL  | 5388,204  | IslaLDKL | 13975,966 | FsaLDKL  | 9940,455  | YsaLDKL  | 9129,626  | LsaVDKL  | 9382,575  |
| LsaLDKI  | 18424,553 | VsaLDKI  | 9634,814  | AsaLDKI  | 4512,106  | IslaLDKI | 13148,805 | FsaLDKI  | 10509,664 | YsaLDKI  | 6011,856  | LsaVDKI  | 10106,555 |
| LsaLDKA  | 16391,066 | VsaLDKA  | 8203,807  | AsaLDKA  | 4573,015  | IslaLDKA | 11419,427 | FsaLDKA  | 10510,584 | YsaLDKA  | 9893,357  | LsaVDKA  | 6724,222  |
| LsaLDKY  | 10789,644 | VsaLDKY  | 7065,764  | AsaLDKY  | 2574,261  | IslaLDKY | 9920,58   | FsaLDKY  | 7626,907  | YsaLDKY  | 5099,866  | LsaVDKY  | 7697,334  |
| LsaLDKD  | 7568,504  | VsaLDKD  | 2895,8136 | AsaLDKD  | 296,9105  | IslaLDKD | 6460,344  | FsaLDKD  | 4429,046  | YsaLDKD  | 3018,184  | LsaVDKD  | 1569,934  |
| LsaVEKE  | 9201,354  | VsaVEKE  | 4487,474  | AsaVEKE  | 189,5977  | IsaVEKE  | 7748,494  | FsaVEKE  | 7686,152  | YsaVEKE  | 2704,179  |          |           |
| LsaVEKV  | 13503,972 | VsaVEKV  | 5978,094  | AsaVEKV  | 1950,334  | IsaVEKV  | 7672,317  | FsaVEKV  | 8782,872  | YsaVEKV  | 2968,514  |          |           |
| LsaVEKL  | 13335,884 | VsaVEKL  | 8030,519  | AsaVEKL  | 2979,801  | IsaVEKL  | 8704,574  | FsaVEKL  | 10264,68  | YsaVEKL  | 3841,314  |          |           |
| LsaVEKI  | 14525,805 | VsaVEKI  | 6922,985  | AsaVEKI  | 4915,6968 | IsaVEKI  | 8307,985  | FsaVEKI  | 11243,104 | YsaVEKI  | 3945,6179 |          |           |
| LsaVEKA  | 11807,015 | VsaVEKA  | 9592,644  | AsaVEKA  | 4953,66   | IsaVEKA  | 10616,155 | FsaVEKA  | 13427,553 | YsaVEKA  | 5485,714  |          |           |
| LsaVEKY  | 11818,084 | VsaVEKY  | 4647,518  | AsaVEKY  | 1566,614  | IsaVEKY  | 4744,914  | FsaVEKY  | 10993,144 | YsaVEKY  | 2436,61   |          |           |
| LsaVEKD  | 8407,1209 | VsaVEKD  | 3111,2811 | AsaVEKD  | -16,656   | IsaVEKD  | 6137,5648 | FsaVEKD  | 6562,457  | YsaVEKD  | 708,8962  |          |           |
| LsaVVEKE | 6177,856  | VsaVVEKE | 5186,891  | AsaVVEKE | 2473,6917 | IsaVVEKE | 5890,733  | FsaVVEKE | 8608,65   | YsaVVEKE | 2709,206  |          |           |
| LsaVVKV  | 2145,268  | VsaVVKV  | 2124,235  | AsaVVKV  | 1874,324  | IsaVVKV  | 2857,51   | FsaVVKV  | 3430,694  | YsaVVKV  | 1110,837  |          |           |
| LsaVVKL  | 4468,524  | VsaVVKL  | 4334,764  | AsaVVKL  | 2855,997  | IsaVVKL  | 5093,4    | FsaVVKL  | 5647,834  | YsaVVKL  | 2953,939  |          |           |
| LsaVVKI  | 3464,219  | VsaVVKI  | 3446,56   | AsaVVKI  | 1801,916  | IsaVVKI  | 4305,26   | FsaVVKI  | 4323,088  | YsaVVKI  | 2115,394  |          |           |

down:  
right

|         |           |         |           |         |           |         |            |         |           |         |           |
|---------|-----------|---------|-----------|---------|-----------|---------|------------|---------|-----------|---------|-----------|
| LsaVVKa | 1616,364  | VsaVVKa | 1659,114  | AsaVVKa | 2129,032  | IsaVVKa | 3060,617   | FsaVVKa | 3639,564  | YsaVVKa | 2192,882  |
| LsaVVKY | 3020,757  | VsaVVKY | 1975,231  | AsaVVKY | 1844,162  | IsaVVKY | 3542,754   | FsaVVKY | 5943,552  | YsaVVKY | 1836,707  |
| LsaVVKD | 5507,277  | VsaVVKD | 3228,092  | AsaVVKD | 110,595   | IsaVVKD | 4908,259   | FsaVVKD | 7256,534  | YsaVVKD | 2566,057  |
| LsaVLKE | 7968,412  | VsaVLKE | 7806,195  | AsaVLKE | 3745,379  | IsaVLKE | 11424,144  | FsaVLKE | 11219,217 | YsaVLKE | 4271,752  |
| LsaVLKV | 4979,894  | VsaVLKV | 3595,714  | AsaVLKV | 3267,548  | IsaVLKV | 6906,984   | FsaVLKV | 4966,666  | YsaVLKV | 2428,619  |
| LsaVLKL | 7443,399  | VsaVLKL | 6194,63   | AsaVLKL | 5147,875  | IsaVLKL | 9449,55    | FsaVLKL | 7538,884  | YsaVLKL | 3398,403  |
| LsaVLKI | 6393,138  | VsaVLKI | 9552,072  | AsaVLKI | 4429,584  | IsaVLKI | 8829,09    | FsaVLKI | 5282,52   | YsaVLKI | 2358,21   |
| LsaVLKa | 4671,014  | VsaVLKa | 6561,914  | AsaVLKa | 2159,537  | IsaVLKa | 7854,923   | FsaVLKa | 3604,326  | YsaVLKa | 1683,522  |
| LsaVLKY | 5847,168  | VsaVLKY | 5086,176  | AsaVLKY | 2207,284  | IsaVLKY | 7717,21    | FsaVLKY | 2984,694  | YsaVLKY | 1450,188  |
| LsaVLKD | 6940,443  | VsaVLKD | 8245,326  | AsaVLKD | 2653,6387 | IsaVLKD | 15106,684  | FsaVLKD | 5867,304  | YsaVLKD | 2811,824  |
| LsaVIKE | 9780,359  | VsaVIKE | 6276,084  | AsaVIKE | 3384,488  | IsaVIKE | 10793,011  | FsaVIKE | 5803,227  | YsaVIKE | 4001,839  |
| LsaVIKV | 4245,839  | VsaVIKV | 3054,139  | AsaVIKV | 2571,504  | IsaVIKV | 4717,33    | FsaVIKV | 2384,375  | YsaVIKV | 1077,616  |
| LsaVIKL | 7194,074  | VsaVIKL | 5617,166  | AsaVIKL | 4234,419  | IsaVIKL | 6938,65    | FsaVIKL | 4561,614  | YsaVIKL | 3165,414  |
| LsaVIKI | 4805,27   | VsaVIKI | 3503,177  | AsaVIKI | 3261,594  | IsaVIKI | 5954,39    | FsaVIKI | 3505,89   | YsaVIKI | 1807,432  |
| LsaVIKa | 2434,044  | VsaVIKa | 2173,216  | AsaVIKa | 2655,594  | IsaVIKa | 5480,785   | FsaVIKa | 2149,846  | YsaVIKa | 2170,398  |
| LsaVIKY | 3968,289  | VsaVIKY | 4483,234  | AsaVIKY | 2411,202  | IsaVIKY | 5842,075   | FsaVIKY | 2895,744  | YsaVIKY | 2545,272  |
| LsaVIKD | 7215,675  | VsaVIKD | 4571,475  | AsaVIKD | 1634,3046 | IsaVIKD | 9662,544   | FsaVIKD | 3922,765  | YsaVIKD | 3048,868  |
| LsaVaKE | 6779,934  | VsaVaKE | 4467,804  | AsaVaKE | 987,834   | IsaVaKE | 6183,814   | FsaVaKE | 5484,618  | YsaVaKE | 1888,004  |
| LsaVaKV | 2191,854  | VsaVaKV | 1020,454  | AsaVaKV | 1334,477  | IsaVaKV | 3905,205   | FsaVaKV | 2114,04   | YsaVaKV | 338,773   |
| LsaVaKL | 3250,364  | VsaVaKL | 2328,345  | AsaVaKL | 3265,451  | IsaVaKL | 3680,492   | FsaVaKL | 3407,95   | YsaVaKL | 457,396   |
| LsaVaKi | 6085,374  | VsaVaKi | 2017,172  | AsaVaKi | 2139,066  | IsaVaKi | 3392,602   | FsaVaKi | 3231,77   | YsaVaKi | 964,774   |
| LsaVaKa | 2978,374  | VsaVaKa | 772,238   | AsaVaKa | 1444,454  | IsaVaKa | 1436,185   | FsaVaKa | 2230,234  | YsaVaKa | 1616,386  |
| LsaVaKY | 3863,655  | VsaVaKY | 1354,83   | AsaVaKY | 870,971   | IsaVaKY | 2211,074   | FsaVaKY | 2612,176  | YsaVaKY | 193,007   |
| LsaVaKD | 6073,364  | VsaVaKD | 2441,263  | AsaVaKD | 199,6229  | IsaVaKD | 4550,2886  | FsaVaKD | 4127,155  | YsaVaKD | 3033,888  |
| LsaVYKE | 6093,696  | VsaVYKE | 4406,834  | AsaVYKE | 1839,181  | IsaVYKE | 6388,534   | FsaVYKE | 5835,854  | YsaVYKE | 4318,03   |
| LsaVYKV | 2299,362  | VsaVYKV | 2300,19   | AsaVYKV | 1772,364  | IsaVYKV | 1927,124   | FsaVYKV | 2768,943  | YsaVYKV | 2253,528  |
| LsaVYKL | 3968,769  | VsaVYKL | 3242,91   | AsaVYKL | 2881,183  | IsaVYKL | 4054,946   | FsaVYKL | 4079,074  | YsaVYKL | 2799,426  |
| LsaVYKI | 3228,488  | VsaVYKI | 2685,224  | AsaVYKI | 2565,338  | IsaVYKI | 3369,736   | FsaVYKI | 3750,874  | YsaVYKI | 3061,934  |
| LsaVYKa | 2131,099  | VsaVYKa | 2090,6    | AsaVYKa | 2004,002  | IsaVYKa | 1878,834   | FsaVYKa | 3839,333  | YsaVYKa | 2840,742  |
| LsaVYKY | 2906,013  | VsaVYKY | 2820,744  | AsaVYKY | 1671,744  | IsaVYKY | 3088,105   | FsaVYKY | 3648,864  | YsaVYKY | 1789,28   |
| LsaVYKD | 4394,996  | VsaVYKD | 2596,918  | AsaVYKD | -91,5958  | IsaVYKD | 5045,938   | FsaVYKD | 4400,762  | YsaVYKD | 1788,2817 |
| LsaVDKE | 3935,014  | VsaVDKE | 57,9561   | AsaVDKE | -40,056   | IsaVDKE | 2260,123   | FsaVDKE | 4309,684  | YsaVDKE | 153,3274  |
| LsaVDKV | 9167,295  | VsaVDKV | 3435,4957 | AsaVDKV | 1660,29   | IsaVDKV | 6125,994   | FsaVDKV | 5192,054  | YsaVDKV | 2433,845  |
| LsaVDKL | 9382,575  | VsaVDKL | 5039,762  | AsaVDKL | 3482,194  | IsaVDKL | 9072,613   | FsaVDKL | 7065,223  | YsaVDKL | 3213,954  |
| LsaVDKI | 10106,555 | VsaVDKI | 3075,664  | AsaVDKI | 1887,004  | IsaVDKI | 8310,208   | FsaVDKI | 9940,546  | YsaVDKI | 2678,954  |
| LsaVDKa | 6724,222  | VsaVDKa | 3580,8764 | AsaVDKa | 804,397   | IsaVDKa | 6969,47    | FsaVDKa | 7523,314  | YsaVDKa | 2525,909  |
| LsaVDKY | 7697,334  | VsaVDKY | 3741,971  | AsaVDKY | 943,7446  | IsaVDKY | 4079,144   | FsaVDKY | 5725,034  | YsaVDKY | 1053,353  |
| LsaVDKD | 1569,934  | VsaVDKD | -40,9003  | AsaVDKD | 0         | IsaVDKD | 749,279    | FsaVDKD | 539,778   | YsaVDKD | -30,039   |
| LsaEKE  | 3236,2825 | VsaEKE  | 1324,0491 | AsaEKE  | 0         | IsaEKE  | 1791,734   | FsaEKE  | 4827,463  | YsaEKE  | 964,243   |
| LsaEKV  | 6025,4679 | VsaEKV  | 3081,804  | AsaEKV  | -18,9028  | IsaEKV  | 3884,454   | FsaEKV  | 6530,583  | YsaEKV  | 1471,7099 |
| LsaEKL  | 7760,354  | VsaEKL  | 3599,004  | AsaEKL  | 917,4092  | IsaEKL  | 4679,182   | FsaEKL  | 11422,701 | YsaEKL  | 2955,664  |
| LsaEKI  | 8424,374  | VsaEKI  | 2839,514  | AsaEKI  | 375,865   | IsaEKI  | 4798,085   | FsaEKI  | 11920,716 | YsaEKI  | 3617,9075 |
| LsaEKa  | 6666,084  | VsaEKa  | 3401,3415 | AsaEKa  | 164,6163  | IsaEKa  | 5311,256   | FsaEKa  | 10535,984 | YsaEKa  | 2200,985  |
| LsaEKY  | 5762,089  | VsaEKY  | 1721,178  | AsaEKY  | -17,7805  | IsaEKY  | 2109,114   | FsaEKY  | 6351,644  | YsaEKY  | 603,048   |
| LsaEKD  | 2989,9411 | VsaEKD  | 16,2504   | AsaEKD  | -48,1748  | IsaEKD  | 1699,3515  | FsaEKD  | 4220,12   | YsaEKD  | 1197,3648 |
| LsaVKE  | 6827,638  | VsaVKE  | 3089,414  | AsaVKE  | -84,14123 | IsaVKE  | 4754,841   | FsaVKE  | 7041,924  | YsaVKE  | 3121,914  |
| LsaVKV  | 2640,524  | VsaVKV  | 2793,534  | AsaVKV  | 394,671   | IsaVKV  | 1516,154   | FsaVKV  | 3478,615  | YsaVKV  | 1432,594  |
| LsaVKL  | 4530,446  | VsaVKL  | 3543,051  | AsaVKL  | 1064,596  | IsaVKL  | 3342,327   | FsaVKL  | 3899,792  | YsaVKL  | 3626,494  |
| LsaVKI  | 3159,356  | VsaVKI  | 3099,064  | AsaVKI  | 820,014   | IsaVKI  | 3495,404   | FsaVKI  | 4122,576  | YsaVKI  | 2718,832  |
| LsaVKA  | 2115,844  | VsaVKA  | 3402,239  | AsaVKA  | 933,349   | IsaVKA  | 3729,448   | FsaVKA  | 3290,49   | YsaVKA  | 1420,556  |
| LsaVKY  | 3407,482  | VsaVKY  | 2327,513  | AsaVKY  | 1560,265  | IsaVKY  | 2980,304   | FsaVKY  | 1434,83   | YsaVKY  | 398,755   |
| LsaVKD  | 6711,1068 | VsaVKD  | 4068,9886 | AsaVKD  | -103,52   | IsaVKD  | 4899,74    | FsaVKD  | 4691,454  | YsaVKD  | 2391,652  |
| LsaLKE  | 7778,05   | VsaLKE  | 5860,809  | AsaLKE  | 9556,079  | IsaLKE  | 9556,079   | FsaLKE  | 7261,034  | YsaLKE  | 3112,634  |
| LsaLKV  | 3924,14   | VsaLKV  | 2615,806  | AsaLKV  | 1631,931  | IsaLKV  | 4179,811   | FsaLKV  | 3561,477  | YsaLKV  | 2545,65   |
| LsaLKL  | 4608,289  | VsaLKL  | 4394,308  | AsaLKL  | 2839,379  | IsaLKL  | 7187,649   | FsaLKL  | 3849,684  | YsaLKL  | 3235,624  |
| LsaLKI  | 3517,744  | VsaLKI  | 4190,095  | AsaLKI  | 2426,927  | IsaLKI  | 6219,351   | FsaLKI  | 4738,215  | YsaLKI  | 4251,094  |
| LsaLKa  | 2573,5263 | VsaLKa  | 2969,478  | AsaLKa  | 1739,682  | IsaLKa  | 4777,748   | FsaLKa  | 3194,797  | YsaLKa  | 1297,611  |
| LsaLKY  | 3815,744  | VsaLKY  | 3610,484  | AsaLKY  | 1751,114  | IsaLKY  | 5596,476   | FsaLKY  | 1956,01   | YsaLKY  | 1284,824  |
| LsaLKD  | 7701,425  | VsaLKD  | 5682,274  | AsaLKD  | 835,7793  | IsaLKD  | 10961,1924 | FsaLKD  | 6552,594  | YsaLKD  | 4181,334  |
| LsaIKE  | 8454,374  | VsaIKE  | 5392,811  | AsaIKE  | 1947,5746 | IsaIKE  | 5633,328   | FsaIKE  | 4987,454  | YsaIKE  | 6250,154  |
| LsaIKV  | 4916,2925 | VsaIKV  | 935,038   | AsaIKV  | 873,649   | IsaIKV  | 1761,018   | FsaIKV  | 3131,636  | YsaIKV  | 1696,214  |



|         |           |         |            |         |           |         |           |         |           |         |           |
|---------|-----------|---------|------------|---------|-----------|---------|-----------|---------|-----------|---------|-----------|
| LsaaIKL | 5212,844  | VsaaIKL | 2074,044   | AsaaIKL | 2216,674  | IsaaIKL | 3203,214  | FsaaIKL | 3526,245  | YsaaIKL | 2976,941  |
| LsaaIKI | 4378,904  | VsaaIKI | 2422,174   | AsaaIKI | 2255,309  | IsaaIKI | 3236,124  | FsaaIKI | 3354,464  | YsaaIKI | 3068,174  |
| LsaaIKa | 3999,614  | VsaaIKa | 2576,505   | AsaaIKa | 1665,754  | IsaaIKa | 2672,998  | FsaaIKa | 2150,453  | YsaaIKa | 2574,438  |
| LsaaIKY | 3251,06   | VsaaIKY | 1273,539   | AsaaIKY | 1376,593  | IsaaIKY | 2202,98   | FsaaIKY | 1996,807  | YsaaIKY | 1661,714  |
| LsaaIKD | 8366,9068 | VsaaIKD | 5014,314   | AsaaIKD | 97,3051   | IsaaIKD | 4322,924  | FsaaIKD | 5551,734  | YsaaIKD | 3418,986  |
| LsaaaKE | 4406,5466 | VsaaaKE | 1580,974   | AsaaaKE | -65,6062  | IsaaaKE | 1929,557  | FsaaaKE | 5330,8065 | YsaaaKE | 3949,024  |
| LsaaaKV | 1321,6944 | VsaaaKV | 381,011    | AsaaaKV | 348,5081  | IsaaaKV | 531,915   | FsaaaKV | 2644,167  | YsaaaKV | 1303,854  |
| LsaaaKL | 2337,261  | VsaaaKL | 490,073    | AsaaaKL | 966,584   | IsaaaKL | 1830,294  | FsaaaKL | 3364,584  | YsaaaKL | 2852,547  |
| LsaaaKI | 2479,2693 | VsaaaKI | 700,123    | AsaaaKI | 374,014   | IsaaaKI | 987,59    | FsaaaKI | 3091,713  | YsaaaKI | 2039,514  |
| LsaaaKa | 783,167   | VsaaaKa | 239,025    | AsaaaKa | -79,9628  | IsaaaKa | 887,696   | FsaaaKa | 2955,52   | YsaaaKa | 1622,154  |
| LsaaaKY | 804,203   | VsaaaKY | 511,557    | AsaaaKY | -154,504  | IsaaaKY | 627,575   | FsaaaKY | 1615,39   | YsaaaKY | 492,737   |
| LsaaaKD | 3339,7382 | VsaaaKD | 1595,184   | AsaaaKD | 0         | IsaaaKD | 2463,6548 | FsaaaKD | 3606,664  | YsaaaKD | 3041,3807 |
| LsaaYKE | 2626,246  | VsaaYKE | 1846,634   | AsaaYKE | 526,3246  | IsaaYKE | 2420,844  | FsaaYKE | 7215,914  | YsaaYKE | 3142,344  |
| LsaaYKV | 1070,699  | VsaaYKV | 1998,251   | AsaaYKV | 816,2305  | IsaaYKV | 2580,118  | FsaaYKV | 3999,014  | YsaaYKV | 2285,663  |
| LsaaYKL | 2827,464  | VsaaYKL | 2855,555   | AsaaYKL | 1643,2202 | IsaaYKL | 2901,747  | FsaaYKL | 6157,387  | YsaaYKL | 3837,014  |
| LsaaYKI | 2648,787  | VsaaYKI | 2405,809   | AsaaYKI | 1099,484  | IsaaYKI | 2739,794  | FsaaYKI | 4962,96   | YsaaYKI | 3231,144  |
| LsaaYKa | 173,8396  | VsaaYKa | 934,5601   | AsaaYKa | 1839,891  | IsaaYKa | 1839,891  | FsaaYKa | 3951,95   | YsaaYKa | 1484,206  |
| LsaaYKY | 1522,402  | VsaaYKY | 2783,463   | AsaaYKY | 270,366   | IsaaYKY | 2001,52   | FsaaYKY | 3730,275  | YsaaYKY | 1538,037  |
| LsaaYKD | 1995,0242 | VsaaYKD | 1831,0085  | AsaaYKD | -20,0139  | IsaaYKD | 2973,233  | FsaaYKD | 5133,528  | YsaaYKD | 1412,308  |
| LsaaDKE | 485,5395  | VsaaDKE | -53,876    | AsaaDKE | 0         | IsaaDKE | 494,5022  | FsaaDKE | 527,2297  | YsaaDKE | -52,1552  |
| LsaaDKV | 2527,0678 | VsaaDKV | 592,1047   | AsaaDKV | -33,0767  | IsaaDKV | 1980,802  | FsaaDKV | 2471,954  | YsaaDKV | 34,1016   |
| LsaaDKL | 4346,3438 | VsaaDKL | 1548,171   | AsaaDKL | 233,203   | IsaaDKL | 4176,127  | FsaaDKL | 5521,632  | YsaaDKL | 1325,164  |
| LsaaDKI | 4422,664  | VsaaDKI | 1254,242   | AsaaDKI | 14,9909   | IsaaDKI | 3996,854  | FsaaDKI | 4027,019  | YsaaDKI | 1114,354  |
| LsaaDKa | 3623,6954 | VsaaDKa | 359,098    | AsaaDKa | -11,8022  | IsaaDKa | 2949,8668 | FsaaDKa | 3083,214  | YsaaDKa | -66,376   |
| LsaaDKY | 4010,1515 | VsaaDKY | 522,695    | AsaaDKY | -102,036  | IsaaDKY | 2179,38   | FsaaDKY | 2263,1963 | YsaaDKY | -112,545  |
| LsaaDKD | -11,0521  | VsaaDKD | 0          | AsaaDKD | -11,1368  | IsaaDKD | -61,4989  | FsaaDKD | 0         | YsaaDKD | -98,4689  |
| LsaIEKE | 15737,724 | VsaIEKE | 15205,1723 | AsaIEKE | 2534,6982 | IsaIEKE | 14911,99  | FsaIEKE | 13578,162 | YsaIEKE | 6629,298  |
| LsaIEKV | 16170,453 | VsaIEKV | 12042,142  | AsaIEKV | 3080,9885 | IsaIEKV | 13666,245 | FsaIEKV | 9653,495  | YsaIEKV | 3576,743  |
| LsaIEKL | 16125,888 | VsaIEKL | 11854,844  | AsaIEKL | 4411,674  | IsaIEKL | 17489,46  | FsaIEKL | 11145,533 | YsaIEKL | 6381,214  |
| LsaIEKI | 17376,151 | VsaIEKI | 11241,922  | AsaIEKI | 4262,889  | IsaIEKI | 17353,992 | FsaIEKI | 10378,838 | YsaIEKI | 5272,411  |
| LsaIEKa | 18089,619 | VsaIEKa | 11139,764  | AsaIEKa | 6101,814  | IsaIEKa | 19135,443 | FsaIEKa | 11946,339 | YsaIEKa | 10716,827 |
| LsaIEKY | 15177,559 | VsaIEKY | 8171,991   | AsaIEKY | 3279,754  | IsaIEKY | 14555,242 | FsaIEKY | 9080      | YsaIEKY | 5040,872  |
| LsaIEKD | 17113,264 | VsaIEKD | 8732,4102  | AsaIEKD | 1621,874  | IsaIEKD | 16191,1   | FsaIEKD | 9602,814  | YsaIEKD | 8404,054  |
| LsaIVKE | 6877,351  | VsaIVKE | 5738,794   | AsaIVKE | 4533,044  | IsaIVKE | 11227,446 | FsaIVKE | 5722,472  | YsaIVKE | 7932,274  |
| LsaIVKV | 3310,68   | VsaIVKV | 2732,39    | AsaIVKV | 2670,158  | IsaIVKV | 5204,139  | FsaIVKV | 3036,509  | YsaIVKV | 3623,362  |
| LsaIVKL | 5264,944  | VsaIVKL | 5533,443   | AsaIVKL | 4438,099  | IsaIVKL | 6886,12   | FsaIVKL | 3746,69   | YsaIVKL | 4299,666  |
| LsaIVKI | 4214,994  | VsaIVKI | 3360,554   | AsaIVKI | 3272,184  | IsaIVKI | 5198,7    | FsaIVKI | 2893,92   | YsaIVKI | 3690,656  |
| LsaIVKa | 2768,953  | VsaIVKa | 2825,316   | AsaIVKa | 2455,71   | IsaIVKa | 5804,328  | FsaIVKa | 2979,778  | YsaIVKa | 7126,43   |
| LsaIVKY | 4553,882  | VsaIVKY | 3722,676   | AsaIVKY | 3504,839  | IsaIVKY | 5412,195  | FsaIVKY | 4096,956  | YsaIVKY | 3656,72   |
| LsaIVKD | 10782,424 | VsaIVKD | 5104,104   | AsaIVKD | 2550,199  | IsaIVKD | 8753,827  | FsaIVKD | 6970,93   | YsaIVKD | 7424,833  |
| LsaILKE | 10706,792 | VsaILKE | 7967,848   | AsaILKE | 6565,982  | IsaILKE | 10944,845 | FsaILKE | 7360,162  | YsaILKE | 12225,964 |
| LsaILKV | 5431,074  | VsaILKV | 3328,003   | AsaILKV | 4205,02   | IsaILKV | 5133,356  | FsaILKV | 4657,192  | YsaILKV | 5340,96   |
| LsaILKL | 7530,894  | VsaILKL | 6971,667   | AsaILKL | 7096,03   | IsaILKL | 7895,17   | FsaILKL | 3529,22   | YsaILKL | 6305,62   |
| LsaILKI | 5932,754  | VsaILKI | 4040,061   | AsaILKI | 4645,25   | IsaILKI | 4930,02   | FsaILKI | 6263,996  | YsaILKI | 5795,99   |
| LsaILKa | 4172,756  | VsaILKa | 3555,768   | AsaILKa | 3786,915  | IsaILKa | 3039,36   | FsaILKa | 3611,987  | YsaILKa | 5548,261  |
| LsaILKY | 5156,741  | VsaILKY | 4939,695   | AsaILKY | 3643,89   | IsaILKY | 6656,494  | FsaILKY | 4983,136  | YsaILKY | 3908,744  |
| LsaILKD | 7800,839  | VsaILKD | 9036,886   | AsaILKD | 5592,214  | IsaILKD | 12768,147 | FsaILKD | 7504,814  | YsaILKD | 8192,679  |
| LsaIIKE | 6803,886  | VsaIIKE | 7076,054   | AsaIIKE | 6244,79   | IsaIIKE | 7461,911  | FsaIIKE | 7248,117  | YsaIIKE | 7332,904  |
| LsaIIKV | 4027,779  | VsaIIKV | 3557,153   | AsaIIKV | 3550,634  | IsaIIKV | 3970,56   | FsaIIKV | 4801,014  | YsaIIKV | 4102,768  |
| LsaIIKL | 5738,034  | VsaIIKL | 6755,574   | AsaIIKL | 5284,531  | IsaIIKL | 6755,5    | FsaIIKL | 6863,41   | YsaIIKL | 4214,884  |
| LsaIIKI | 4457,02   | VsaIIKI | 5017,614   | AsaIIKI | 3856,052  | IsaIIKI | 4791,55   | FsaIIKI | 5605,814  | YsaIIKI | 5232,545  |
| LsaIIKa | 3031,534  | VsaIIKa | 3229,867   | AsaIIKa | 4270,864  | IsaIIKa | 3871,511  | FsaIIKa | 5149,563  | YsaIIKa | 3856,079  |
| LsaIIKY | 4516,207  | VsaIIKY | 4189,032   | AsaIIKY | 4275,232  | IsaIIKY | 5078,45   | FsaIIKY | 6838,683  | YsaIIKY | 3269,936  |
| LsaIIKD | 6250,964  | VsaIIKD | 6760,955   | AsaIIKD | 4541,744  | IsaIIKD | 9202,414  | FsaIIKD | 9553,291  | YsaIIKD | 6789,19   |
| LsaIaKE | 6251,966  | VsaIaKE | 5892,714   | AsaIaKE | 3688,4187 | IsaIaKE | 7856,54   | FsaIaKE | 13354,753 | YsaIaKE | 5550,178  |
| LsaIaKV | 2404,766  | VsaIaKV | 2402,462   | AsaIaKV | 1468,955  | IsaIaKV | 2346,52   | FsaIaKV | 5042,669  | YsaIaKV | 1120,195  |
| LsaIaKL | 3388,214  | VsaIaKL | 3692,984   | AsaIaKL | 2193,742  | IsaIaKL | 3126,962  | FsaIaKL | 6302,734  | YsaIaKL | 1854,024  |
| LsaIaKI | 3149,094  | VsaIaKI | 2983,758   | AsaIaKI | 1444,552  | IsaIaKI | 3625,815  | FsaIaKI | 4301,714  | YsaIaKI | 1894,994  |
| LsaIaKa | 1718,2587 | VsaIaKa | 2981,704   | AsaIaKa | 1246,024  | IsaIaKa | 3647,794  | FsaIaKa | 5306,922  | YsaIaKa | 4327,584  |
| LsaIaKY | 3722,57   | VsaIaKY | 1456,943   | AsaIaKY | 1304,684  | IsaIaKY | 3078,259  | FsaIaKY | 6242,839  | YsaIaKY | 2167,382  |
| LsaIaKD | 5603,8207 | VsaIaKD | 4664,084   | AsaIaKD | 1726,841  | IsaIaKD | 6422,444  | FsaIaKD | 12378,004 | YsaIaKD | 5133,426  |

|         |           |         |            |         |           |         |            |         |           |         |           |
|---------|-----------|---------|------------|---------|-----------|---------|------------|---------|-----------|---------|-----------|
| LsaIYKE | 6979,594  | VsaIYKE | 5037,25    | AsaIYKE | 3804,147  | IsaIYKE | 7151,254   | FsaIYKE | 13334,624 | YsaIYKE | 4805,16   |
| LsaIYKV | 2240,534  | VsaIYKV | 2531,814   | AsaIYKV | 2234,439  | IsaIYKV | 2708,192   | FsaIYKV | 4599,774  | YsaIYKV | 2757,303  |
| LsaIYKL | 3474,937  | VsaIYKL | 3462,194   | AsaIYKL | 2660,614  | IsaIYKL | 4376,558   | FsaIYKL | 6754,884  | YsaIYKL | 4602,887  |
| LsaIYKI | 3688,716  | VsaIYKI | 2331,318   | AsaIYKI | 3202,865  | IsaIYKI | 3862,344   | FsaIYKI | 4955,55   | YsaIYKI | 3341,034  |
| LsaIYKa | 2586,294  | VsaIYKa | 5081,992   | AsaIYKa | 2749,494  | IsaIYKa | 2850,893   | FsaIYKa | 3071,394  | YsaIYKa | 4597,176  |
| LsaIYKY | 3643,874  | VsaIYKY | 4169,763   | AsaIYKY | 2116,24   | IsaIYKY | 4022,633   | FsaIYKY | 3557,409  | YsaIYKY | 2591,563  |
| LsaIYKD | 6758,076  | VsaIYKD | 6490,236   | AsaIYKD | 1638,6109 | IsaIYKD | 7668,354   | FsaIYKD | 5880,327  | YsaIYKD | 5574,254  |
| LsaIDKE | 9171,424  | VsaIDKE | 5185,074   | AsaIDKE | 198,31242 | IsaIDKE | 10835,633  | FsaIDKE | 6022,975  | YsaIDKE | 2041,644  |
| LsaIDKV | 11944,509 | VsaIDKV | 7540,517   | AsaIDKV | 2446,078  | IsaIDKV | 13298,764  | FsaIDKV | 7420,037  | YsaIDKV | 4672,597  |
| LsaIDKL | 13020,73  | VsaIDKL | 9010,36    | AsaIDKL | 3624,674  | IsaIDKL | 18077,202  | FsaIDKL | 11793,93  | YsaIDKL | 8405,311  |
| LsaIDKI | 11636,684 | VsaIDKI | 8105,846   | AsaIDKI | 3523,07   | IsaIDKI | 14530,429  | FsaIDKI | 7746,849  | YsaIDKI | 4978,035  |
| LsaIDKa | 12727,453 | VsaIDKa | 6236,676   | AsaIDKa | 3480,961  | IsaIDKa | 17607,153  | FsaIDKa | 7928,206  | YsaIDKa | 8411,434  |
| LsaIDKY | 10492,199 | VsaIDKY | 7255,837   | AsaIDKY | 2071,594  | IsaIDKY | 14531,772  | FsaIDKY | 6978,104  | YsaIDKY | 3490,374  |
| LsaIDKD | 5090,4342 | VsaIDKD | 1625,784   | AsaIDKD | 67,0296   | IsaIDKD | 5898,464   | FsaIDKD | 1839,484  | YsaIDKD | 1890,313  |
| LsaFEKE | 15490,304 | VsaFEKE | 13385,7636 | AsaFEKE | 3175,3204 | IsaFEKE | 20267,119  | FsaFEKE | 13363,576 | YsaFEKE | 13616,249 |
| LsaFEKV | 12971,696 | VsaFEKV | 10571,592  | AsaFEKV | 3801,884  | IsaFEKV | 15234,264  | FsaFEKV | 9450,356  | YsaFEKV | 11828,511 |
| LsaFEKL | 13864,892 | VsaFEKL | 14296,98   | AsaFEKL | 5172,273  | IsaFEKL | 19554,113  | FsaFEKL | 12218,664 | YsaFEKL | 13013,57  |
| LsaFEKI | 12352,794 | VsaFEKI | 10479,251  | AsaFEKI | 5509,676  | IsaFEKI | 18196,984  | FsaFEKI | 10244,888 | YsaFEKI | 9062,193  |
| LsaFEKa | 19418,144 | VsaFEKa | 12403,81   | AsaFEKa | 6359,394  | IsaFEKa | 17598,286  | FsaFEKa | 13776,672 | YsaFEKa | 13289,814 |
| LsaFEKY | 15526,753 | VsaFEKY | 8907,764   | AsaFEKY | 3155,067  | IsaFEKY | 12742,184  | FsaFEKY | 8587,074  | YsaFEKY | 5464,744  |
| LsaFEKD | 17166,184 | VsaFEKD | 9143,0482  | AsaFEKD | 1706,894  | IsaFEKD | 14358,176  | FsaFEKD | 12999,2   | YsaFEKD | 14684,142 |
| LsaFVKE | 10566,084 | VsaFVKE | 9081,984   | AsaFVKE | 5049,96   | IsaFVKE | 9538,147   | FsaFVKE | 8320,307  | YsaFVKE | 10314,926 |
| LsaFVKV | 4449,603  | VsaFVKV | 4319,631   | AsaFVKV | 2817,265  | IsaFVKV | 3275,51    | FsaFVKV | 3892,964  | YsaFVKV | 6232,96   |
| LsaFVKL | 6250,221  | VsaFVKL | 6275,851   | AsaFVKL | 5524,748  | IsaFVKL | 6242,639   | FsaFVKL | 6154,636  | YsaFVKL | 6690,59   |
| LsaFVKI | 4509,661  | VsaFVKI | 5511,917   | AsaFVKI | 3221,034  | IsaFVKI | 4969,96    | FsaFVKI | 6466,46   | YsaFVKI | 6754,292  |
| LsaFVKa | 3224,932  | VsaFVKa | 3890,654   | AsaFVKa | 3154,874  | IsaFVKa | 4950,179   | FsaFVKa | 5200,851  | YsaFVKa | 6650,594  |
| LsaFVKY | 4162,023  | VsaFVKY | 5148,208   | AsaFVKY | 4771,179  | IsaFVKY | 4713,774   | FsaFVKY | 4615,4    | YsaFVKY | 2710,03   |
| LsaFVKD | 7863,834  | VsaFVKD | 7890,194   | AsaFVKD | 2446,395  | IsaFVKD | 7567,728   | FsaFVKD | 10492,937 | YsaFVKD | 9935,447  |
| LsaFLKE | 11235,145 | VsaFLKE | 13731,906  | AsaFLKE | 8188,514  | IsaFLKE | 12086,8    | FsaFLKE | 15403,398 | YsaFLKE | 9436,414  |
| LsaFLKV | 5862,525  | VsaFLKV | 7224,028   | AsaFLKV | 3403,874  | IsaFLKV | 7441,791   | FsaFLKV | 7847,654  | YsaFLKV | 5566,054  |
| LsaFLKL | 7256,167  | VsaFLKL | 8830,896   | AsaFLKL | 7044,44   | IsaFLKL | 8742,69    | FsaFLKL | 11283,46  | YsaFLKL | 6514,117  |
| LsaFLKI | 6192,481  | VsaFLKI | 6339,004   | AsaFLKI | 5005,904  | IsaFLKI | 5584,46    | FsaFLKI | 10644,608 | YsaFLKI | 4904,32   |
| LsaFLKa | 4606,834  | VsaFLKa | 6648,889   | AsaFLKa | 3853,865  | IsaFLKa | 7449,659   | FsaFLKa | 8017,048  | YsaFLKa | 4192,729  |
| LsaFLKY | 5168,059  | VsaFLKY | 4698,169   | AsaFLKY | 3068,034  | IsaFLKY | 7972,57    | FsaFLKY | 7358,88   | YsaFLKY | 2969,771  |
| LsaFLKD | 9865,544  | VsaFLKD | 12459,443  | AsaFLKD | 6859,536  | IsaFLKD | 14134,257  | FsaFLKD | 14890,859 | YsaFLKD | 8979,97   |
| LsaFIKE | 9653,533  | VsaFIKE | 9970,404   | AsaFIKE | 5356,154  | IsaFIKE | 11342,264  | FsaFIKE | 14409,924 | YsaFIKE | 6921,341  |
| LsaFIKV | 5127,301  | VsaFIKV | 5591,72    | AsaFIKV | 2490,784  | IsaFIKV | 6541,704   | FsaFIKV | 6701,9    | YsaFIKV | 4593,494  |
| LsaFIKL | 6430,014  | VsaFIKL | 7454,264   | AsaFIKL | 4043,454  | IsaFIKL | 8423,19    | FsaFIKL | 10183,355 | YsaFIKL | 6100,816  |
| LsaFIKI | 5440,164  | VsaFIKI | 5465,879   | AsaFIKI | 3019,831  | IsaFIKI | 5966,57    | FsaFIKI | 9055,176  | YsaFIKI | 5338,807  |
| LsaFIKa | 3681,794  | VsaFIKa | 5183,596   | AsaFIKa | 2903,801  | IsaFIKa | 5886,027   | FsaFIKa | 8402,694  | YsaFIKa | 4423,536  |
| LsaFIKY | 4865,233  | VsaFIKY | 6194,522   | AsaFIKY | 3537,934  | IsaFIKY | 6425,909   | FsaFIKY | 7266,72   | YsaFIKY | 3046,273  |
| LsaFIKD | 9603,354  | VsaFIKD | 9259,762   | AsaFIKD | 3379,294  | IsaFIKD | 11127,584  | FsaFIKD | 12217,024 | YsaFIKD | 8341,151  |
| LsaFAKE | 8607,9686 | VsaFAKE | 7669,381   | AsaFAKE | 3878,2682 | IsaFAKE | 9048,898   | FsaFAKE | 14533,251 | YsaFAKE | 10772,288 |
| LsaFAKV | 3767,715  | VsaFAKV | 2436,078   | AsaFAKV | 1029,534  | IsaFAKV | 3993,618   | FsaFAKV | 4543,381  | YsaFAKV | 3077,399  |
| LsaFAKL | 4900,339  | VsaFAKL | 6535,325   | AsaFAKL | 2319,923  | IsaFAKL | 5224,195   | FsaFAKL | 5337,971  | YsaFAKL | 3639,616  |
| LsaFAKI | 4386,981  | VsaFAKI | 4052,788   | AsaFAKI | 1769,39   | IsaFAKI | 5589,679   | FsaFAKI | 3973,724  | YsaFAKI | 3167,14   |
| LsaFAKa | 2890,084  | VsaFAKa | 3433,254   | AsaFAKa | 651,545   | IsaFAKa | 4869,124   | FsaFAKa | 4182,891  | YsaFAKa | 6568,281  |
| LsaFAKY | 3602,794  | VsaFAKY | 2545,804   | AsaFAKY | 1422,3189 | IsaFAKY | 4779,545   | FsaFAKY | 2610,286  | YsaFAKY | 1789,34   |
| LsaFAKD | 6966,66   | VsaFAKD | 6555,4789  | AsaFAKD | 2120,074  | IsaFAKD | 9977,159   | FsaFAKD | 8739,914  | YsaFAKD | 10067,649 |
| LsaFYKE | 9343,932  | VsaFYKE | 8676,907   | AsaFYKE | 3802,914  | IsaFYKE | 11906,211  | FsaFYKE | 7966,511  | YsaFYKE | 10778,192 |
| LsaFYKV | 4029,006  | VsaFYKV | 3363,094   | AsaFYKV | 2579,839  | IsaFYKV | 5733,996   | FsaFYKV | 4145,962  | YsaFYKV | 4340,523  |
| LsaFYKL | 5506,619  | VsaFYKL | 5139,944   | AsaFYKL | 3338,735  | IsaFYKL | 9133,584   | FsaFYKL | 4722,25   | YsaFYKL | 4712,441  |
| LsaFYKI | 4373,904  | VsaFYKI | 4573,949   | AsaFYKI | 2513,744  | IsaFYKI | 7131,952   | FsaFYKI | 4259,119  | YsaFYKI | 4869,896  |
| LsaFYKa | 3685,074  | VsaFYKa | 3566,51    | AsaFYKa | 2438,144  | IsaFYKa | 5316,052   | FsaFYKa | 3701,374  | YsaFYKa | 5908,324  |
| LsaFYKY | 4515,224  | VsaFYKY | 4131,25    | AsaFYKY | 2137,431  | IsaFYKY | 6905,724   | FsaFYKY | 3494,972  | YsaFYKY | 3614,01   |
| LsaFYKD | 7630,387  | VsaFYKD | 7422,566   | AsaFYKD | 2692,32   | IsaFYKD | 8013,521   | FsaFYKD | 6148,105  | YsaFYKD | 7855,834  |
| LsaFDKE | 5688,572  | VsaFDKE | 3941,0648  | AsaFDKE | 590,0651  | IsaFDKE | 10154,2922 | FsaFDKE | 7314,566  | YsaFDKE | 3692,324  |
| LsaFDKV | 7355,819  | VsaFDKV | 5719,382   | AsaFDKV | 2501,228  | IsaFDKV | 12350,844  | FsaFDKV | 6473,149  | YsaFDKV | 3437,593  |
| LsaFDKL | 18962,144 | VsaFDKL | 9083,037   | AsaFDKL | 4396,634  | IsaFDKL | 14259,764  | FsaFDKL | 7636,674  | YsaFDKL | 8169,974  |
| LsaFDKI | 13794,608 | VsaFDKI | 6603,594   | AsaFDKI | 3445,702  | IsaFDKI | 9368,381   | FsaFDKI | 7051,084  | YsaFDKI | 5917,064  |
| LsaFDKa | 10130,124 | VsaFDKa | 6553,434   | AsaFDKa | 3276,854  | IsaFDKa | 10782,484  | FsaFDKa | 8163,504  | YsaFDKa | 9528,158  |

|                   |                   |                  |                   |                   |                  |
|-------------------|-------------------|------------------|-------------------|-------------------|------------------|
| LsAFDKY 8772,726  | VsAFDKY 5181,483  | AsAFDKY 2065,873 | IsAFDKY 7387,554  | FsAFDKY 4489,684  | YsAFDKY 4318,412 |
| LsAFDKD 4868,4874 | VsAFDKD 1771,384  | AsAFDKD -77,1993 | IsAFDKD 3389,6842 | FsAFDKD 3303,721  | YsAFDKD 2660,708 |
| LsAYEKE 6679,6556 | VsAYEKE 3517,7144 | AsAYEKE 511,1511 | IsAYEKE 5386,138  | FsAYEKE 7115,941  | YsAYEKE 4750,984 |
| LsAYEKV 6706,424  | VsAYEKV 5178,671  | AsAYEKV 1298,454 | IsAYEKV 6141,58   | FsAYEKV 6000,914  | YsAYEKV 4177,302 |
| LsAYEKL 7078,108  | VsAYEKL 6448,482  | AsAYEKL 2171,354 | IsAYEKL 8252,904  | FsAYEKL 11644,984 | YsAYEKL 6779,613 |
| LsAYEKI 6889,233  | VsAYEKI 5698,702  | AsAYEKI 1949,654 | IsAYEKI 6482,335  | FsAYEKI 8794,383  | YsAYEKI 5606,945 |
| LsAYEKA 7383,8082 | VsAYEKA 5358,454  | AsAYEKA 1469,248 | IsAYEKA 5943,594  | FsAYEKA 8618,287  | YsAYEKA 5546,033 |
| LsAYEKK 5472,214  | VsAYEKK 4160,667  | AsAYEKK -7,583   | IsAYEKK 4808,509  | FsAYEKK 6736,684  | YsAYEKK 3163,205 |
| LsAYEKD 5053,324  | VsAYEKD 2339,571  | AsAYEKD -111,636 | IsAYEKD 4691,014  | FsAYEKD 5083,789  | YsAYEKD 2050,194 |
| LsAYVKE 5141,582  | VsAYVKE 5034,654  | AsAYVKE 2273,354 | IsAYVKE 5315,25   | FsAYVKE 10065,731 | YsAYVKE 2861,305 |
| LsAYVKV 4161,681  | VsAYVKV 2099,988  | AsAYVKV 2643,139 | IsAYVKV 4354,474  | FsAYVKV 5307,186  | YsAYVKV 2216,688 |
| LsAYVKL 5068,495  | VsAYVKL 5211,072  | AsAYVKL 2962,782 | IsAYVKL 6248,444  | FsAYVKL 8492,679  | YsAYVKL 4375,681 |
| LsAYVKI 4128,484  | VsAYVKI 3600,474  | AsAYVKI 2438,904 | IsAYVKI 6274,893  | FsAYVKI 7408,53   | YsAYVKI 2838,564 |
| LsAYVKA 2871,998  | VsAYVKA 4539,142  | AsAYVKA 1445,697 | IsAYVKA 4330,367  | FsAYVKA 5106,347  | YsAYVKA 1871,556 |
| LsAYVKY 2994,184  | VsAYVKY 4876,517  | AsAYVKY 1733,819 | IsAYVKY 3677,774  | FsAYVKY 4476,42   | YsAYVKY 2742,63  |
| LsAYVKD 3731,748  | VsAYVKD 4078,63   | AsAYVKD 18,918   | IsAYVKD 4129,064  | FsAYVKD 4167,89   | YsAYVKD 1955,206 |
| LsAYLKE 6037,98   | VsAYLKE 8189,738  | AsAYLKE 2825,117 | IsAYLKE 8699,953  | FsAYLKE 8333,309  | YsAYLKE 3640,695 |
| LsAYLKV 4881,445  | VsAYLKV 5919,46   | AsAYLKV 2612,781 | IsAYLKV 6669,161  | FsAYLKV 7029,68   | YsAYLKV 4395,273 |
| LsAYLKL 6705,694  | VsAYLKL 7468,774  | AsAYLKL 3580,537 | IsAYLKL 6558,84   | FsAYLKL 8559,42   | YsAYLKL 4737,694 |
| LsAYLKI 5717,092  | VsAYLKI 7029,991  | AsAYLKI 3613,194 | IsAYLKI 7579,021  | FsAYLKI 8246,04   | YsAYLKI 3413,53  |
| LsAYLKA 4228,016  | VsAYLKA 5663,304  | AsAYLKA 1870,454 | IsAYLKA 5261,922  | FsAYLKA 3971,39   | YsAYLKA 3241,447 |
| LsAYLKY 3361,219  | VsAYLKY 3789,942  | AsAYLKY 1527,204 | IsAYLKY 4108,368  | FsAYLKY 3883,165  | YsAYLKY 873,244  |
| LsAYLKD 4885,464  | VsAYLKD 4440,984  | AsAYLKD 1760,001 | IsAYLKD 7441,664  | FsAYLKD 7159,714  | YsAYLKD 2821,584 |
| LsAYIKE 6585,314  | VsAYIKE 12374,284 | AsAYIKE 2275,854 | IsAYIKE 8418,485  | FsAYIKE 5393,967  | YsAYIKE 3687,124 |
| LsAYIKV 5071,084  | VsAYIKV 6370,824  | AsAYIKV 1750,087 | IsAYIKV 5773,434  | FsAYIKV 4763,152  | YsAYIKV 2717,107 |
| LsAYIKL 6520,624  | VsAYIKL 8221,798  | AsAYIKL 3119,667 | IsAYIKL 8901,304  | FsAYIKL 6339,59   | YsAYIKL 4502,104 |
| LsAYIKI 5074,662  | VsAYIKI 5075,884  | AsAYIKI 2580,166 | IsAYIKI 6184,388  | FsAYIKI 5648,527  | YsAYIKI 2709,262 |
| LsAYIKA 4022,854  | VsAYIKA 5063,054  | AsAYIKA 1641,162 | IsAYIKA 7146,052  | FsAYIKA 3196,097  | YsAYIKA 2792,622 |
| LsAYIKY 3310,558  | VsAYIKY 4095,475  | AsAYIKY 1691,844 | IsAYIKY 5272,055  | FsAYIKY 3477,57   | YsAYIKY 2963,92  |
| LsAYIKD 4474,843  | VsAYIKD 4343,662  | AsAYIKD 844,787  | IsAYIKD 7718,854  | FsAYIKD 3089,117  | YsAYIKD 2084,91  |
| LsAYAKE 5541,161  | VsAYAKE 4823,054  | AsAYAKE 675,62   | IsAYAKE 8645,855  | FsAYAKE 6003,494  | YsAYAKE 4372,694 |
| LsAYAKV 2812,502  | VsAYAKV 2875,454  | AsAYAKV 672,885  | IsAYAKV 5244,234  | FsAYAKV 3659,614  | YsAYAKV 1978,469 |
| LsAYAKL 3862,894  | VsAYAKL 3866,694  | AsAYAKL 1248,839 | IsAYAKL 8223,314  | FsAYAKL 4898,714  | YsAYAKL 3699,764 |
| LsAYAKI 3768,41   | VsAYAKI 2764,155  | AsAYAKI 842,844  | IsAYAKI 6446,138  | FsAYAKI 4443,463  | YsAYAKI 3093,856 |
| LsAYAKA 2890,05   | VsAYAKA 2768,199  | AsAYAKA 602,147  | IsAYAKA 3719,454  | FsAYAKA 4104,254  | YsAYAKA 2946,709 |
| LsAYAKY 2136,434  | VsAYAKY 2917,692  | AsAYAKY 706,16   | IsAYAKY 5497,75   | FsAYAKY 3374,654  | YsAYAKY 1203,744 |
| LsAYAKD 3029,744  | VsAYAKD 3347,8706 | AsAYAKD 111,5843 | IsAYAKD 7027,7415 | FsAYAKD 5083,834  | YsAYAKD 2425,603 |
| LsAYYKE 9315,015  | VsAYYKE 4175,637  | AsAYYKE 2025,944 | IsAYYKE 6122,904  | FsAYYKE 6986,67   | YsAYYKE 3521,84  |
| LsAYYKV 4958,653  | VsAYYKV 2975,247  | AsAYYKV 2096,168 | IsAYYKV 4022,125  | FsAYYKV 3714,82   | YsAYYKV 3074,4   |
| LsAYYKL 4716,255  | VsAYYKL 4165,221  | AsAYYKL 3098,124 | IsAYYKL 4193,165  | FsAYYKL 4121,588  | YsAYYKL 5564,1   |
| LsAYYKI 4192,739  | VsAYYKI 3907,001  | AsAYYKI 2812,008 | IsAYYKI 3643,692  | FsAYYKI 4204,36   | YsAYYKI 4116,07  |
| LsAYYKA 2734,274  | VsAYYKA 3199,276  | AsAYYKA 1767,971 | IsAYYKA 2952,178  | FsAYYKA 3076,444  | YsAYYKA 2464,874 |
| LsAYYKY 2594,104  | VsAYYKY 3264,854  | AsAYYKY 1631,971 | IsAYYKY 2794,76   | FsAYYKY 2973,73   | YsAYYKY 2383,06  |
| LsAYYKD 2821,589  | VsAYYKD 2448,814  | AsAYYKD 226,242  | IsAYYKD 2668,034  | FsAYYKD 2966,105  | YsAYYKD 1290,626 |
| LsAYDKE 2481,514  | VsAYDKE 500,6147  | AsAYDKE -117,199 | IsAYDKE 1490,212  | FsAYDKE 2101,344  | YsAYDKE 34,477   |
| LsAYDKV 4452,3994 | VsAYDKV 2323,822  | AsAYDKV 673,383  | IsAYDKV 3353,713  | FsAYDKV 3926,887  | YsAYDKV 975,539  |
| LsAYDKL 6198,894  | VsAYDKL 3821,518  | AsAYDKL 1748,484 | IsAYDKL 4140,548  | FsAYDKL 7477,124  | YsAYDKL 2300,474 |
| LsAYDKI 5446,062  | VsAYDKI 3157,489  | AsAYDKI 1151,879 | IsAYDKI 4394,152  | FsAYDKI 5816,496  | YsAYDKI 2173,114 |
| LsAYDKA 4259,081  | VsAYDKA 1595,034  | AsAYDKA 3,678    | IsAYDKA 3880,344  | FsAYDKA 4230,511  | YsAYDKA 890,1962 |
| LsAYDKY 3526,384  | VsAYDKY 1836,414  | AsAYDKY 277,9769 | IsAYDKY 3709,404  | FsAYDKY 3526,834  | YsAYDKY 627,157  |
| LsAYDKD 817,3261  | VsAYDKD -75,056   | AsAYDKD 0        | IsAYDKD 954,314   | FsAYDKD 843,206   | YsAYDKD -30,3926 |
